# Supplementary material for: Climate change promotes hybridisation between deeply divergent species
Source: PeerJ. 2017 Mar 23;5:e3072. doi: 10.7717/peerj.3072 (PMC5366042; doi:10.7717/peerj.3072)
Supplement: Supplemental Information 1 [file peerj-05-3072-s001.xlsx]

## Sheet: punti
Longitude	Latitude
12.4935	41.8913
11.557	43.7348
10.6034	43.0285
12.3875	43.762
8.21243	44.9355
8.86778	44.6915
12.3448	41.8197
11.8849	44.9701
13.0759	41.3711
12.3858	41.701
13.0621	41.2543
10.5568	43.1108
11.024	42.6868
10.5177	43.0003
12.009	44.2119
12.3409	44.2837
11.2	42.8899
12.0395	42.1148
13.419	41.2759
12.2316	44.5093
9.73384	44.9572
9.87764	44.8512
11.0678	44.6857
11.8956	44.6511
10.9054	44.896
9.50356	45.0174
9.38269	44.717
9.64577	45.0745
9.62848	44.8685
13.5542	41.2205
12.6005	41.7776
12.9167	42.0368
12.4355	41.8661
12.1211	42.1234
12.9397	43.8725
12.8772	43.8898
11.151	42.4228
16.1534	41.7621
12.6333	41.938
10.7582	42.8071
10.568	43.225
11.8659	44.4425
11.5715	42.3345
15.6596	41.5274
15.2806	41.6917
11.2834	44.4726
12.2674	44.5099
12.0504	42.0209
11.8301	42.1221
14.4162	40.8511
11.986	42.1487
14.5977	40.9386
12.0619	42.2481
11.4763	43.6289
11.5724	44.7017
12.6105	42.225
11.2484	43.7625
15.9332	41.9296
13.1868	42.5751
11.822	44.3825
12.3739	41.9221
16.5508	39.3873
11.5413	44.5955
11.6218	44.543
11.7203	44.5173
8.65574	45.0274
12.6369	42.3844
16.0993	39.0676
15.8196	39.6941
16.0089	39.4436
15.7791	39.9
15.9316	37.9795
16.1722	38.1446
15.6851	38.0483
11.446	44.61
15.5671	41.4478
11.4193	44.465
15.9958	39.8727
15.3184	40.6015
15.3148	40.555
14.5597	40.9668
13.0461	41.2455
13.0455	41.236
12.5891	41.9132
12.4827	41.9128
16.0686	39.1398
14.1944	40.823
10.894	44.7777
10.3646	44.8677
10.2974	44.6429
11.4698	43.8407
14.637	40.9406
16.8256	41.0737
16.06	39.2357
15.8939	37.9871
11.1039	44.7701
12.5561	41.8401
16.5465	41.2211
9.03571	44.8849
16.8577	39.1331
15.8888	37.9292
10.8739	44.4995
10.99	44.4736
9.86549	45.0833
12.0469	44.5083
12.6791	43.9728
11.8715	42.7851
10.6996	43.0608
8.79401	44.7907
8.89604	44.7113
8.76848	44.7761
12.2369	44.692
15.9992	37.9315
11.3161	44.5555
11.1275	44.7245
12.2309	41.9244
10.5076	43.72
8.64471	44.7609
13.5786	43.5352
13.9176	42.4604
8.96616	44.9718
8.87073	44.6579
16.1483	38.0584
16.971	39.2939
14.1848	42.4936
16.7321	39.6154
17.1218	39.3492
16.8301	39.17
16.1101	37.9879
16.0693	37.9324
15.3786	40.4385
11.6311	44.3477
11.7534	44.874
11.9738	44.8843
10.8407	44.3206
8.60567	45.0657
8.74432	44.9574
12.4175	41.7761
12.8876	41.4203
8.56296	44.8986
11.4224	43.5715
16.2088	39.5038
16.4585	39.8169
16.5822	39.942
16.036	39.3512
12.3264	44.1096
11.0925	44.9199
12.5937	41.489
8.68144	44.818
7.94352	44.866
15.8597	39.7999
15.7937	41.1611
16.4871	41.1943
16.4876	39.3533
10.8023	44.6535
11.7223	42.2032
12.1766	42.334
10.4049	43.5949
10.553	43.3233
10.4913	43.5511
10.3185	43.7656
15.9393	41.4554
12.6351	43.4724
11.6389	42.423
12.5568	41.5461
13.0627	41.2875
14.9105	40.9391
12.916	42.0923
17.1258	39.2051
16.8988	39.5215
16.8867	39.4435
16.1339	39.005
16.8534	39.3277
15.0483	40.8379
15.042	40.7336
11.7714	42.6158
12.3463	42.2376
10.4714	43.6043
7.99268	44.7012
7.94702	44.9442
15.661	41.4213
14.9324	40.8824
11.8443	42.1855
9.2883	44.908
16.317	38.5581
15.6698	37.9793
11.503	44.5377
11.5187	44.7168
11.6758	44.5999
11.3323	44.3831
11.657	44.8081
10.9286	44.5977
9.79864	45.0449
10.2185	44.8209
10.4678	44.9118
12.0162	44.3629
10.5944	44.6303
10.653	44.5209
10.6421	44.8604
10.7225	44.6557
10.865	44.8804
12.404	44.0218
12.4561	44.0175
12.7091	43.9416
12.0693	42.4157
11.4867	42.3768
11.6947	42.2613
11.4222	43.3224
11.1836	43.8181
16.0091	41.4216
15.6852	41.3659
16.1355	41.3665
12.0795	42.0887
10.6283	44.8892
10.4481	44.7743
12.0972	44.4631
10.1876	44.8785
17.0818	38.9339
16.578	38.5045
16.2577	38.92
16.5237	38.6766
16.9521	39.0835
16.4118	38.3351
16.5806	38.456
15.0117	41.0139
14.2105	40.8591
9.74337	45.0223
9.80005	45.0613
11.9152	44.4088
12.0809	44.4691
12.2534	44.5857
10.4682	44.6282
13.0927	41.7342
10.6669	44.5442
12.2632	41.7443
12.7334	42.0332
10.7949	42.7869
10.3531	43.6453
16.8848	41.1064
15.6448	41.3884
15.2947	41.9133
15.37	41.8957
12.4452	41.8869
14.7849	42.0351
15.0911	41.4649
15.8724	41.5532
15.4365	41.4288
12.6737	41.9765
12.9298	41.3963
9.60725	44.924
11.943	44.7265
12.166	44.8981
13.9733	40.988
16.2514	39.0996
16.2862	39.0903
16.0803	38.7065
15.8918	38.6703
14.0709	41.0951
14.0014	40.9737
11.2577	44.5662
11.9919	44.2294
11.8281	44.5598
12.2231	44.5771
12.2519	44.5889
11.5905	44.8835
12.2456	44.8558
9.92504	44.9332
10.0357	44.9834
12.2387	44.5452
12.2588	41.8621
11.077	42.6594
11.2194	42.8271
7.96702	45.0818
15.6625	41.9039
15.8964	41.9035
15.2999	41.5021
15.0654	41.5253
15.3643	41.3781
15.9537	38.6833
13.4177	41.2773
12.5978	42.2314
18.2295	40.4402
16.547	38.9865
12.5993	41.8477
16.1889	38.9424
14.4488	40.9148
14.527	40.7087
14.53	40.8646
12.8062	43.8566
13.1973	43.7026
16.0144	38.1496
14.4048	40.856
17.533	40.7387
17.9862	40.6248
15.9194	41.2781
16.8644	41.1234
17.3056	40.9035
16.3388	40.9592
17.5276	40.6765
13.018	43.8189
16.6909	39.6182
16.3024	40.1503
15.9674	38.488
16.098	38.1623
14.8665	41.2466
14.1445	40.8758
13.5692	43.3066
16.8889	40.9212
17.805	40.6953
17.4163	40.7721
17.762	40.6993
18.1568	40.1787
17.1284	40.9266
18.0287	40.0114
17.6774	40.5161
17.8729	40.448
18.1703	40.4658
17.7471	40.3009
17.7849	40.7032
18.1291	39.8871
17.697	40.7545
17.9421	40.5461
13.0523	43.8258
16.8282	38.9169
14.4776	41.2012
13.7013	42.831
13.4048	42.733
16.8588	40.5644
16.6036	41.065
18.2972	40.3804
16.7463	41.1583
17.5555	40.5992
17.1611	38.9855
16.4145	38.3991
13.0102	43.8208
13.1717	43.582
13.6178	43.4644
13.6397	43.4741
12.8651	43.3495
16.7089	40.2001
8.39321	44.2091
8.4238	44.2475
9.87874	44.1726
8.99546	44.4263
11.2904	43.1428
11.6357	43.512
10.3081	43.838
11.929	43.0967
10.9418	42.7909
8.74264	44.4277
